# Supplementary material for: Metabolic pathway for a new strain Pseudomonas synxantha LSH-7′: from chemotaxis to uptake of n-hexadecane
Source: PubMed Central journal article supplement (PMC5209730; doi:10.1038/srep39068), 2017-01-04
Supplement: srep39068-s1.pdf [file srep39068-s1.pdf]

## Scientific Reports

### Metabolic pathway for a new strain *Pseudomonas synxantha* LSH-7': from chemotaxis to uptake of *n*-hexadecane

Long Meng<sup>1,2</sup>, Haoshuai Li<sup>1,2</sup>, Mutai Bao<sup>1,2,\*</sup> & Peiyan Sun<sup>3</sup>

<sup>1</sup> *Key Laboratory of Marine Chemistry Theory and Technology, Ministry of Education, Ocean University of China, Qingdao 266100, China*

<sup>2</sup> *College of Chemistry & Chemical Engineering, Ocean University of China, Qingdao 266100, China*

<sup>3</sup> *Key Laboratory of Marine Spill Oil Identification and Damage Assessment Technology, North China Sea Environmental Monitoring Center, State Oceanic Administration, Qingdao 266033, China*

---

\* Corresponding author: [mtbao@ouc.edu.cn](mailto:mtbao@ouc.edu.cn) (M. Bao), Tel/Fax: +86-532-66782509, E-mail: [mtbao@ouc.edu.cn](mailto:mtbao@ouc.edu.cn),  
Tel/Fax: +86-532-66782509.

## Supplementary information

Figure S1

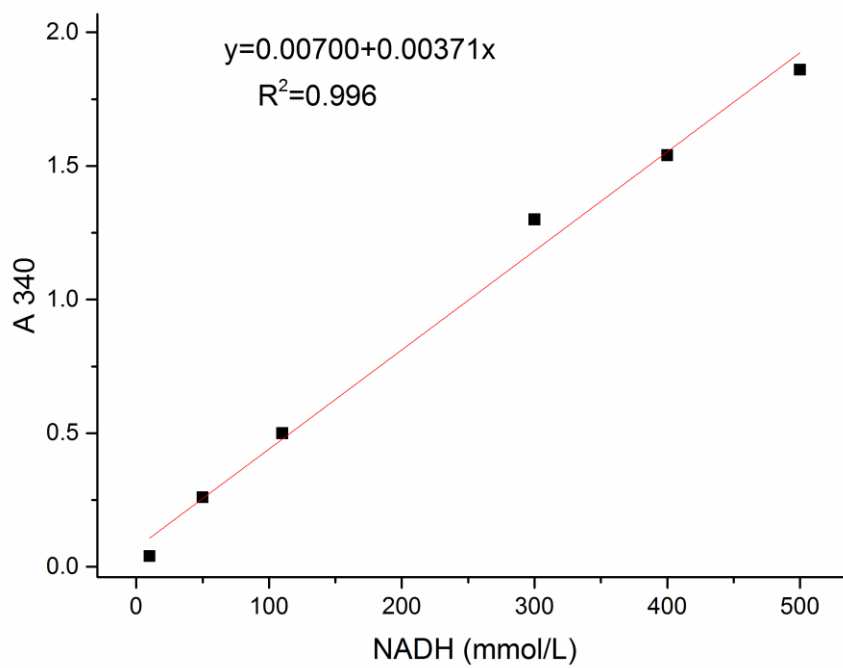

**Fig. S1.** The calibration curve between absorbance (A340) and the concentration of NADH (mmol/L).
